# Supplementary material for: Membrane recruitment of Atg8 by Hfl1 facilitates turnover of vacuolar membrane proteins in yeast cells approaching stationary phase
Source: PubMed Central journal article supplement (PMC8176713; doi:10.1186/s12915-021-01048-7), 2021-06-04
Supplement: 12915_2021_1048_MOESM2_ESM.pdf [file 12915_2021_1048_MOESM2_ESM.pdf]

**Table S1. Plasmid Set I\*.**

| *Fragments from parental plasmids were obtained by restriction enzyme digestion. |                                      |                     |                   |                                                                                                         |                                 |
|----------------------------------------------------------------------------------|--------------------------------------|---------------------|-------------------|---------------------------------------------------------------------------------------------------------|---------------------------------|
| Plasmid                                                                          | Parental Plasmid                     | Inserted Fragments  | Restriction Sites | Primers                                                                                                 | Templates /Sources              |
| P <sub>CUP1</sub> -GFP-Pho8-406                                                  | P <sub>CUP1</sub> -GFP-Atg8-406 [12] | Pho8                | BsrGI, KpnI       | ATGGATGAATTGTACAAAGGAGCCGGAACAAGTGACATGATGACTCACACATTACC,<br>ACTATAGGGCGAATTGGGTACCGCGCTTCACTTAACGACGAT | Genomic DNA                     |
| P <sub>CUP1</sub> -GFP-Osh1-406                                                  | P <sub>CUP1</sub> -GFP-Atg8-406      | GFP                 | SpeI, KpnI        | ATATAGAAGTCATCGACTAGTAAC,<br>GATAGATCAGGTTGTTCCATGTCACCTGTTCCGGCTCCTT                                   | P <sub>CUP1</sub> -GFP-Atg8-406 |
|                                                                                  |                                      | Osh1                |                   | ATGGAACAACCTGATCTATCG,<br>CTATAGGGCGAATTGGGTACCATCGGCTTTGAATCCATGGG                                     | Genomic DNA                     |
| P <sub>CUP1</sub> -GFP-Cps1-406                                                  | P <sub>CUP1</sub> -GFP-Atg8-406      | Cps1                | BsrGI, KpnI       | ATGGATGAATTGTACAAAGGAGCCGGAACAAGTGACATGATCGCCTTACCAGTAGA,<br>GAATTGGGTACCCTTTACGCAAGTGGTTTTGA           | Genomic DNA                     |
| Vph1-2×GFP-URA(K.I.)                                                             | KT209-2×GFP-URA3(K.I.) [67]          | Vph1(ORF+ promoter) | HindIII           | AACGCGGCCCGCCAGCTGAAGCTTGCTAGCTTTTACCTTTCTCT,<br>GTCGACCTGCAGCGTACGAAGCGCTTGAAGCGGAAGAGCTTG             | Genomic DNA                     |
|                                                                                  |                                      | Vph1(terminator)    | SpeI              | TCGATGATATCAGATCCACTAGTGAGGACTTTTAAAAAAGCGA,<br>TCGATGATATCAGATCCACTAGTTAAATTTTGAGGACTTTTAAA            | Genomic DNA                     |
| Ypq2-2×GFP-URA(K.I.)                                                             | KT209-2×GFP-URA3(K.I.)               | Ypq2(ORF+ promoter) | HindIII           | AACGCGGCCCGCCAGCTGAAGCTTGGTACCAGTGTTATCACTAAG,<br>GTCGACCTGCAGCGTACGAAGCTGTTTGCCTTTCACCAGACA            | Genomic DNA                     |
|                                                                                  |                                      | Ypq2(terminator)    | SpeI              | TCGATGATATCAGATCCACTAGTTAGTTTTCCCTACGGAGTACT,<br>CCGCGGCCCGCATAGGCCACTAGTCTCGAGCAGTTGGGTCCAC            | Genomic DNA                     |
| BS-TRP1-TetO7-GFP-Pho8                                                           | BS-TRP1 [67]                         | TetO7               | HindIII           | GAGGTCGACGGTATCGATAAGCTTGAATTCTTATTACGATCCTCG,<br>GAATAATTCTTACCTTTAGACATCGGCCGCTATCGATGTTAA            | CM189 [68]                      |
|                                                                                  |                                      | GFP-Pho8            |                   | ATGTCTAAAGGTGAAGAATTATTC,<br>CTGCAGGAATTCGATATCAAGCTTCACTTAACGACGATGCCGAT                               | P <sub>CUP1</sub> -GFP-Pho8-406 |

|                                           |                       |                                 |                   |                                                                                                           |                                                 |
|-------------------------------------------|-----------------------|---------------------------------|-------------------|-----------------------------------------------------------------------------------------------------------|-------------------------------------------------|
| BS-URA3-TetR'-Ssn6                        | BS-URA3 [67]          | TetR'-Ssn6                      | SpeI              | GCAGCCCGGGGATCCACTAGTCGCCATGTTGACATTGATTA, TTGCGGCCGCTCTAGAAGTAGTAAGGATACGAAAATGCACCT                     | CM244 [69]                                      |
| ClhN-URA3(K.1.)                           | UG72                  | T1                              | PstI              | ACGCTGCAGGTCGTGGGATTCCTGGGTAAATTAACATCGCTAG CCCTAGGTGAGGCGCGCCACTTCTAA, GACCTGCAGATATTACCCTGTTATCCCTAGCGG | Fa6A-3HA-TRP [70]                               |
| ClhN-MET15                                | ClhN-URA3(K.1.)       | MET15                           | XbaI, SacI        | TTAGGTCTAGATGCGAATTAACACTGTTCTT, CTCGAGAGCTCCATTTAAATCCAATCTTCC                                           | Genomic DNA                                     |
| P <sub>ATG8</sub> -MET15                  | ClhN-MET15            | P <sub>ATG8</sub>               | NheI, AvrII       | GGGTTAATTAACATCGCTAGCCCTTAAAACTCCATTGAAGAC , GAAGTGGCGCGCCTCACCTAGGGTCTCTAGTAATTATTTTAT                   | Genomic DNA                                     |
| ClhN-HIS5(S.p.)                           | UG27                  | T1                              | PstI              | ACGCTGCAGGTCGTGGGATTCCTGGGTAAATTAACATCGCTAG CCCTAGGTGAGGCGCGCCACTTCTAA, GACCTGCAGATATTACCCTGTTATCCCTAGCGG | Fa6A-3HA-TRP                                    |
| ClhN-2flag-HIS5(S.p.)                     | ClhN-flag-HIS5(S.p.)  | flag                            | NheI, AvrII, PvuI | (N/A)                                                                                                     | ClhN-flag-HIS5(S.p.)                            |
| ClhN-4flag-HIS5(S.p.)                     | ClhN-2flag-HIS5(S.p.) | flag                            | NheI, AvrII, PvuI | (N/A)                                                                                                     | ClhN-flag-HIS5(S.p.)                            |
| IAA17-4flag-HIS5(S.p.)                    | ClhN-4flag-HIS5(S.p.) | IAA17                           | PacI, NheI        | TCGTGGGATTCCTGGGTAAATTAACATGATGGCAGTGTGCGAG CT, CGATGTTAATTAACCCGCTAGCAGCTCTGCTCTTGCACTTCT                | MK43-BYP6740 [48]                               |
| HIS5(S.p.)-P <sub>VAC8</sub> -IAA17-4flag | ClhN-HIS5(S.p.)       | P <sub>VAC8</sub> , IAA17-4flag | EcoRV, SacII      | ATACGAAGTTATTAGGTGATATAGTGTATCGTCGCTGGAA, TCAGCTCGACACTGCCCATCATACCCATAGTTGCAAATGTAT                      | Genomic DNA                                     |
|                                           |                       |                                 |                   | ACTATGGGTATGATGGCAGTGTGCGAGCTG, AGGCCACTAGTGGATCTGATCCTAGGTTTATCATCATCAT                                  | IAA17-4flag-HIS5(S.p.)                          |
| P <sub>ADHI</sub> -TIR1-9myc-MET15        | ClhN-MET15            | P <sub>ADHI</sub> -TIR1-9myc    | NheI              | TGGGTAAATTAACATCGCTAGCAATTCGGGTGTACAATATGG, GCGCGCCTCACCTAGGGCTAGCCTTTTTTAGCTAGTGGATCCG                   | NHK53-BYP6744 [48]                              |
| BS-TRP1-P <sub>GAL</sub>                  | BS-TRP1               | P <sub>GAL</sub>                | HindIII           | GAGGTCGACGGTATCGATAAGCTTGGCATTACCACCATATACA T, TGCAGGAATTCGATATCAAGCTATAGTTTTTTCTCCTTGACGT TAAAG          | pRS405-pGAL1-10-tc-aptA-amber-FPA-TGA-ApeI [71] |
| P <sub>TPI1</sub> -Dsred-MET15            | ClhN-MET15            | P <sub>TPI1</sub> , Dsred       | NheI, AscI        | TGGGTAAATTAACATCGCTAGCATGCAGGACGTTATGAAGAA, TCGCTTATTTAGAAGTGGCGCGCCCTATAAGAACAGGTGGTGG CG                | TRT                                             |
| P <sub>ATG18</sub> -KanMX                 | UG6                   | P <sub>ATG18</sub>              | Sall              | AGCTTCGTACGCTGCAGGTCGACCTGTAACCTTCTTGTTCGTG ,                                                             | Genomic DNA                                     |

|                                                                           |          |                                 |            |                                                                                        |                                                              |
|---------------------------------------------------------------------------|----------|---------------------------------|------------|----------------------------------------------------------------------------------------|--------------------------------------------------------------|
|                                                                           |          |                                 |            | GAAGTTATATTAAGGGTTGTCGACTGTCAGGCCGAAGAAGAAA<br>A                                       |                                                              |
| BS-ZJLEU-<br>P <sub>TEF1</sub> -HFL1-<br>GFP                              | BS-ZJLEU | P <sub>TEF1</sub> -HFL1-<br>GFP | ApaI, SpeI | CGAGGTCGACGGTATCGATACCACACACCATAGCTTCAAA,<br>GGCGGCCGCTCTAGAACTAGTCTATTTGTATAGTTCATCCA | P <sub>TEF1</sub> -HFL1-GFP-<br>LEU                          |
| BS-ZJLEU-<br>P <sub>TEF1</sub> -HFL1-<br>W371A-GFP                        | BS-ZJLEU | P <sub>TEF1</sub> -HFL1-<br>GFP | ApaI, SpeI | CGAGGTCGACGGTATCGATACCACACACCATAGCTTCAAA,<br>GGCGGCCGCTCTAGAACTAGTCTATTTGTATAGTTCATCCA | P <sub>TEF1</sub> -HFL1-W371A-<br>GFP-LEU                    |
| BS-ZJLEU-<br>P <sub>TEF1</sub> -HFL1-<br>I375A-GFP                        | BS-ZJLEU | P <sub>TEF1</sub> -HFL1-<br>GFP | ApaI, SpeI | CGAGGTCGACGGTATCGATACCACACACCATAGCTTCAAA,<br>GGCGGCCGCTCTAGAACTAGTCTATTTGTATAGTTCATCCA | P <sub>TEF1</sub> -HFL1-I375A-<br>GFP-LEU                    |
| BS-ZJLEU-<br>P <sub>TEF1</sub> -HFL1-<br>D384A-GFP                        | BS-ZJLEU | P <sub>TEF1</sub> -HFL1-<br>GFP | ApaI, SpeI | CGAGGTCGACGGTATCGATACCACACACCATAGCTTCAAA,<br>GGCGGCCGCTCTAGAACTAGTCTATTTGTATAGTTCATCCA | P <sub>TEF1</sub> -HFL1-D384A-<br>GFP-LEU                    |
| BS-ZJLEU-<br>P <sub>TEF1</sub> -HFL1-<br>Y387A-GFP                        | BS-ZJLEU | P <sub>TEF1</sub> -HFL1-<br>GFP | ApaI, SpeI | CGAGGTCGACGGTATCGATACCACACACCATAGCTTCAAA,<br>GGCGGCCGCTCTAGAACTAGTCTATTTGTATAGTTCATCCA | P <sub>TEF1</sub> -HFL1-Y387A-<br>GFP-LEU                    |
| BS-ZJLEU-<br>P <sub>TEF1</sub> -HFL1-<br>W371AI375A<br>-GFP               | BS-ZJLEU | P <sub>TEF1</sub> -HFL1-<br>GFP | ApaI, SpeI | CGAGGTCGACGGTATCGATACCACACACCATAGCTTCAAA,<br>GGCGGCCGCTCTAGAACTAGTCTATTTGTATAGTTCATCCA | P <sub>TEF1</sub> -HFL1-<br>W371AI375A-GFP-<br>LEU           |
| BS-ZJLEU-<br>P <sub>TEF1</sub> -HFL1-<br>D384AY387<br>A-GFP               | BS-ZJLEU | P <sub>TEF1</sub> -HFL1-<br>GFP | ApaI, SpeI | CGAGGTCGACGGTATCGATACCACACACCATAGCTTCAAA,<br>GGCGGCCGCTCTAGAACTAGTCTATTTGTATAGTTCATCCA | P <sub>TEF1</sub> -HFL1-<br>D384AY387A-GFP-<br>LEU           |
| BS-ZJLEU-<br>P <sub>TEF1</sub> -HFL1-<br>W371AI375A<br>D384AY387<br>A-GFP | BS-ZJLEU | P <sub>TEF1</sub> -HFL1-<br>GFP | ApaI, SpeI | CGAGGTCGACGGTATCGATACCACACACCATAGCTTCAAA,<br>GGCGGCCGCTCTAGAACTAGTCTATTTGTATAGTTCATCCA | P <sub>TEF1</sub> -HFL1-<br>W371AI375AD384A<br>Y387A-GFP-LEU |

|                            |                      |                 |                   |                                                                                                                                                                                                                                                             |                                    |
|----------------------------|----------------------|-----------------|-------------------|-------------------------------------------------------------------------------------------------------------------------------------------------------------------------------------------------------------------------------------------------------------|------------------------------------|
| PCUP1-GFP-Vma13-Ura        | ClhN-GFP             | PCUP1;<br>Vma13 | AscI              | CGTGGGATTCCCTGGGCTAGTTAGAAAAAGACATTTTTGCTGTC<br>AGTCAC,<br>AGCGATGTTAATTAACATGATGACTTCTATATGATATTGCACT<br>ACAAGAAGATATTATAATGCA;<br>CTATACAAACCTAGGATGGGCGCAACCAAAATTTAATGGAC,<br>CGCTTATTTAGAAGTGGCGCGCCTTATTTGAAGGTATATCCAA<br>TGATTGCCTGC                | Genomic DNA;<br>PCUP1-GFP-Pho8-406 |
| PCUP1-Vac8-GFP-Ura         | ClhN-GFP             | PCUP1;<br>Vac8  | AscI              | CGTGGGATTCCCTGGGCTAGTTAGAAAAAGACATTTTTGCTGTC<br>AGTCAC,<br>ACAACATGAACCCATGATGACTTCTATATGATATTGCACTAAC<br>AAGAAGATATTATAATGCA;<br>CATATAGAAGTCATCATGGGTTTCATGTTGTAGTTGCTTGAAAG<br>,<br>AGCGATGTTAATTAATGTAAAAATGTAAAAATCTGTTGAGTA<br>ATATTATACAATTCCAAACTTG | Genomic DNA;<br>PCUP1-GFP-Pho8-406 |
| BS-Trp-PCUP1-4myc-Pho8     | BS-Trp-PCUP1-4myc-Ub | Pho8            | Avr II,<br>Sac II | CTGAAGAAGATTTGCCTAGGATGATGACTCACACATTACCAAG<br>CGAAC,<br>CAGTAATAACCCACCGCGGGAGAGTTAGATAGGATCAGTTGGT<br>CAACTC                                                                                                                                              | Genomic DNA                        |
| PCUP1-4V5-Pho8-Met         | PCUP1-4V5-Ub-Met     | Pho8            | Avr II,<br>Asc I  | GTTTGGATTCTACTCCTAGGATGATGACTCACACATTACCAAG<br>CGAAC,<br>CGCTTATTTAGAAGTGGCGCGCCGAGAGTTAGATAGGATCAGT<br>TGGTCAACTC                                                                                                                                          | Genomic DNA                        |
| Tg13-GFP<br>[72]           | (N/A)                | (N/A)           | (N/A)             | (N/A)                                                                                                                                                                                                                                                       | (N/A)                              |
| BS-URA3-GFP-Atg8<br>[67]   | (N/A)                | (N/A)           | (N/A)             | (N/A)                                                                                                                                                                                                                                                       | (N/A)                              |
| BS-URA3-Atg18-2GFP<br>[67] | (N/A)                | (N/A)           | (N/A)             | (N/A)                                                                                                                                                                                                                                                       | (N/A)                              |

**Table S2. Plasmids Set II#.**

| #Fragments from parental plasmids were obtained by PCR amplification. |                                                                                                   |                                |                                                                                                             |                                     |
|-----------------------------------------------------------------------|---------------------------------------------------------------------------------------------------|--------------------------------|-------------------------------------------------------------------------------------------------------------|-------------------------------------|
| Plasmid                                                               | Primers for Plasmid Backbone                                                                      | Templates /Sources             | Primers for Inserted Fragment                                                                               | Templates /Sources                  |
| BS-TRP1-P <sub>GAL</sub> -GFP-Cps1                                    | GCTTGATATCGAATTCCTGCA,<br>TATAGTTTTTTCTCCTTGACGTTAAAGT<br>ATAGAGG                                 | BS-TRP1-<br>P <sub>GAL</sub>   | TTAACGTCAAGGAGAAAAAACTATAATGTCTAAAGG<br>TGAAGAATTATTC,<br>GGGCTGCAGGAATTCGATATCAAGCCTTTACGCAAG<br>TGGTTTTGA | P <sub>CUP1</sub> -GFP-Cps1-<br>406 |
| BS-TRP1-TetO7-<br>mRuby3-Pho8                                         | GGAGCCGGAACAAGTGACAT,<br>GCCTGCTGGATGAATAGCTT                                                     | BS-TRP1-<br>TetO7-GFP-<br>Pho8 | AAGCTATTCATCCAGCAGGC,<br>CTCTTCGCCCTTAGACACCATCGCCGCTATCGATGT<br>TAACA                                      | BS-TRP1-<br>TetO7-GFP-<br>Pho8      |
|                                                                       |                                                                                                   |                                | ATGGTGTCTAAGGGCGAAGA,<br>TCATGTCACTTGTTCGGCTCCCTTGTACAGCTCGT<br>CCATGC                                      | NCS-<br>mRuby3[73]                  |
| P1K-3HA-Atg8-<br>MET15                                                | TGAGGCGCGCCACTTCTA,<br>CCTCAACCTTTAATGGTTCC                                                       | P <sub>ATG8</sub> -<br>MET15   | GGAACCATTAAAGGTTGAGGAGGGGATTGATAAGAG<br>AATCT,<br>TTTAGAAGTGGCGCGCCTCACCTGCCAAATGTATTT<br>TCTC              | 3HA-ATG8-306                        |
| P1K-3HA-<br>Atg8ΔGR-<br>MET15                                         | TGAGGCGCGCCACTTCTA,<br>CCTCAACCTTTAATGGTTCC                                                       | P <sub>ATG8</sub> -<br>MET15   | GGAACCATTAAAGGTTGAGGAGGGGATTGATAAGAG<br>AATCT,<br>TTTAGAAGTGGCGCGCCTCAAAATGTATTTTCTCCT<br>GAGTAAGT          | 3HA-ATG8-306                        |
| P1K-3HA-<br>Atg8ΔR-MET15                                              | TGAGGCGCGCCACTTCTA,<br>CCTCAACCTTTAATGGTTCC                                                       | P <sub>ATG8</sub> -<br>MET15   | GGAACCATTAAAGGTTGAGGAGGGGATTGATAAGAG<br>AATCT,<br>TTTAGAAGTGGCGCGCCTCAGCCAAATGTATTTTCT<br>CCTG              | 3HA-ATG8-306                        |
| ClhN-flag-<br>HIS5(S.p.)                                              | GATAAACCTAGGTGAGGCGCGCCACTTC<br>TA,<br>CTCACCTAGGTTTATCATCATCATCTTT<br>ATAATCGCTAGCGATGTTAATTAACC | ClhN-<br>HIS5(S.p.)            | (N/A)                                                                                                       | (N/A)                               |

|                               |                                                                                              |            |                                                                                               |                             |
|-------------------------------|----------------------------------------------------------------------------------------------|------------|-----------------------------------------------------------------------------------------------|-----------------------------|
| P1K-HFL1-8flag-LEU            | GGCGGCCACTTCTAAATAAGCGAA<br>TTTCTTATGATTTAT,<br>AACCCAGGAATCCCACGACCACAAG<br>CCATTGATGACCTAC | UG74-8flag | ATAAATCATAAGAAATTCGCTTATTTAGAAGTG<br>GCGCGCC,<br>GTAGGTCATCAATGGCTTGTGGTCGTGGGATTC<br>CTGGGTT | P1K-HFL1-GFP-LEU            |
| P1K-HFL1-W371A-8flag-LEU      | GGCGGCCACTTCTAAATAAGCGAA<br>TTTCTTATGATTTAT,<br>AACCCAGGAATCCCACGACCACAAG<br>CCATTGATGACCTAC | UG74-8flag | ATAAATCATAAGAAATTCGCTTATTTAGAAGTG<br>GCGCGCC,<br>GTAGGTCATCAATGGCTTGTGGTCGTGGGATTC<br>CTGGGTT | P1K-HFL1-W371A-GFP-LEU      |
| P1K-HFL1-I375A-8flag-LEU      | GGCGGCCACTTCTAAATAAGCGAA<br>TTTCTTATGATTTAT,<br>AACCCAGGAATCCCACGACCACAAG<br>CCATTGATGACCTAC | UG74-8flag | ATAAATCATAAGAAATTCGCTTATTTAGAAGTG<br>GCGCGCC,<br>GTAGGTCATCAATGGCTTGTGGTCGTGGGATTC<br>CTGGGTT | P1K-HFL1-I375A-GFP-LEU      |
| P1K-HFL1-D384A-8flag-LEU      | GGCGGCCACTTCTAAATAAGCGAA<br>TTTCTTATGATTTAT,<br>AACCCAGGAATCCCACGACCACAAG<br>CCATTGATGACCTAC | UG74-8flag | ATAAATCATAAGAAATTCGCTTATTTAGAAGTG<br>GCGCGCC,<br>GTAGGTCATCAATGGCTTGTGGTCGTGGGATTC<br>CTGGGTT | P1K-HFL1-D384A-GFP-LEU      |
| P1K-HFL1-Y387A-8flag-LEU      | GGCGGCCACTTCTAAATAAGCGAA<br>TTTCTTATGATTTAT,<br>AACCCAGGAATCCCACGACCACAAG<br>CCATTGATGACCTAC | UG74-8flag | ATAAATCATAAGAAATTCGCTTATTTAGAAGTG<br>GCGCGCC,<br>GTAGGTCATCAATGGCTTGTGGTCGTGGGATTC<br>CTGGGTT | P1K-HFL1-Y387A-GFP-LEU      |
| P1K-HFL1-W371AI375A8flag-LEU  | GGCGGCCACTTCTAAATAAGCGAA<br>TTTCTTATGATTTAT,<br>AACCCAGGAATCCCACGACCACAAG<br>CCATTGATGACCTAC | UG74-8flag | ATAAATCATAAGAAATTCGCTTATTTAGAAGTG<br>GCGCGCC,<br>GTAGGTCATCAATGGCTTGTGGTCGTGGGATTC<br>CTGGGTT | P1K-HFL1-W371AI375A-GFP-LEU |
| P1K-HFL1-D384AY387A-8flag-LEU | GGCGGCCACTTCTAAATAAGCGAA<br>TTTCTTATGATTTAT,<br>AACCCAGGAATCCCACGACCACAAG<br>CCATTGATGACCTAC | UG74-8flag | ATAAATCATAAGAAATTCGCTTATTTAGAAGTG<br>GCGCGCC,<br>GTAGGTCATCAATGGCTTGTGGTCGTGGGATTC<br>CTGGGTT | P1K-HFL1-D384AY387A-GFP-LEU |

|                                                               |                                                                                                       |                                           |                                                                                               |                                                             |
|---------------------------------------------------------------|-------------------------------------------------------------------------------------------------------|-------------------------------------------|-----------------------------------------------------------------------------------------------|-------------------------------------------------------------|
| <b>P1K-HFL1-<br/>W371AI375AD3<br/>84AY387A-<br/>8flag-LEU</b> | GGCGGCCCACTTCTAAATAAGCGAA<br>TTTCTTATGATTTAT,<br>AACCCAGGAATCCCACGACCACAAG<br>CCATTGATGACCTAC         | <b>UG74-8flag</b>                         | ATAAATCATAAGAAATTCGCTTATTTAGAAGTG<br>GCGCGCC,<br>GTAGGTCATCAATGGCTTGTGGTCGTGGGATTC<br>CTGGGTT | <b>P1K-HFL1-<br/>W371AI375AD3<br/>84AY387A-<br/>GFP-LEU</b> |
| <b>P<sub>CUPI</sub>-mRuby3-<br/>Pho8</b>                      | GACGAGCTGTACAAGGGAGCCGGAA<br>CAAGTGACATGATG,<br>GCCCTTAGACACCATGTTACTAGTC<br>GATGACTTCTATATGATATTGCAC | <b>P<sub>CUPI</sub>-GFP-<br/>Pho8-406</b> | ATGGTGTCTAAGGGCGAAGAGCTG,<br>CTTGTACAGCTCGTCCATGCCAC                                          | <b>BS-TRP1-<br/>TetO7-mRuby3-<br/>Pho8</b>                  |

**Table S3. Plasmids Set III<sup>&</sup>.**

| & Point mutations constructed by site-directed mutagenesis. |                                                                                                                                                       |                                     |
|-------------------------------------------------------------|-------------------------------------------------------------------------------------------------------------------------------------------------------|-------------------------------------|
| Plasmid                                                     | Primers for site-directed mutagenesis                                                                                                                 | Templates /Sources                  |
| P <sub>CUP1</sub> -GFP-PHO8(K(24,25,30,33)R)                | AGAAGGAGACGGATCTCGAGGAGATCAAGGATAATAGTATCCACTGTG,<br>CCTTGATCTCCTCGAGATCCGTCTCCTTCTAGGACGAGAG                                                         | P <sub>CUP1</sub> -GFP-PHO8-406     |
| P <sub>CUP1</sub> -GFP-PHO8(K(24,25,30)R)                   | AGAAGGAGACGGATCTCGAGGAGATCAAGGATAATAGTATCCACTGTG,<br>CCTTGATCTCCTCGAGATCCGTCTCCTTCTAGGACGAGAG                                                         | P <sub>CUP1</sub> -GFP-PHO8-406     |
| P <sub>CUP1</sub> -GFP-PHO8(K(30,33)R)                      | AGAAGGAGACGGATCTCGAGGAGATCAAGGATAATAGTATCCACTGTG,<br>CCTTGATCTCCTCGAGATCCGTCTCCTTCTAGGACGAGAG                                                         | P <sub>CUP1</sub> -GFP-PHO8-406     |
| P <sub>CUP1</sub> -GFP-PHO8(K(33)R)                         | AGAAGGAGACGGATCTCGAGGAGATCAAGGATAATAGTATCCACTGTG,<br>CCTTGATCTCCTCGAGATCCGTCTCCTTCTAGGACGAGAG                                                         | P <sub>CUP1</sub> -GFP-PHO8-406     |
| ClhN-P1K-3VSV-Atg8(T56A T87A)-MET15                         | CTAGTTCCTGCTGACCTTGCGGTAGGGCAATTTG &<br>GCAAGGTCAGCAGGAAGTATATTTACGCTTATC,<br>GATACTTTGCCACCTGCTGCGGCGTTGATG &<br>CAGCAGGTGGCAAAGTATCATTGACAAAAATGAAG | ClhN-P1K-3VSV-Atg8-MET15            |
| ClhN-P1K-3VSV-Atg8(P85A P86A)-MET15                         | CATTTTTGTCAATGATACTTTGGCCGCTACTGCGGCGTTG,<br>GTATCATTGACAAAAATGAAGATGGCCTTCTCAGG                                                                      | ClhN-P1K-3VSV-Atg8-MET15            |
| ClhN-P1K-3VSV-Atg8(P85L P86L)-MET15                         | CATTTTTGTCAATGATACTTTGTTGTTGACTGCGGCGTTG,<br>GTATCATTGACAAAAATGAAGATGGCCTTCTCAGG                                                                      | ClhN-P1K-3VSV-Atg8-MET15            |
| ClhN-P1K-3VSV-Atg8(T56A R65A T87A)-MET15                    | CCGTAGGGCAATTTGTTTATGTTATAGCGAAGAGAATTATGC,<br>CATAAACAAATTGCCCTACGGCAAGGTCAGCAGG                                                                     | ClhN-P1K-3VSV-Atg8(T56A T87A)-MET15 |
| ClhN-P1K-3VSV-Atg8(R65A P85A P86A)-MET15                    | CCGTAGGGCAATTTGTTTATGTTATAGCGAAGAGAATTATGC,<br>CATAAACAAATTGCCCTACGGTAAGGTCAGCAGG                                                                     | ClhN-P1K-3VSV-Atg8(P85A P86A)-MET15 |
| ClhN-P1K-3VSV-Atg8(R65A P85L P86L)-MET15                    | CCGTAGGGCAATTTGTTTATGTTATAGCGAAGAGAATTATGC,<br>CATAAACAAATTGCCCTACGGTAAGGTCAGCAGG                                                                     | ClhN-P1K-3VSV-Atg8(P85L P86L)-MET15 |
| ClhN-P1K-3VSV-Atg8(L55W T56A V61W R65A)-MET15               | AGGGCAATTTGGTATGTTATAGCGAAGAGAATTATGCTACC,<br>TAACATACCAAATTTGCCCTACCGCCAGTCAGCAG                                                                     | ClhN-P1K-3VSV-Atg8-MET15            |



**Table S4. Primers for gene knockout and tagging.**

| Operation             | Primers                                                                                                                       |
|-----------------------|-------------------------------------------------------------------------------------------------------------------------------|
| <i>ATG1</i> knockout  | TCAAATCTCTTTTACAACACCAGACGAGAAATTAAGAAAGCTTCGTACGCTGCAGGTCG,<br>ATTTGTACTTAATAAGAAAACCATATTATGCATCACTTAGCATAGGCCACTAGTGGATC   |
| <i>ATG2</i> knockout  | AAATTAAGAGGAACCCTTTTTTTTTTTTGATTTTCGATACAGCTTCGTACGCTGCAGGTCG,<br>GAATTGAATATATATCAAAAATGTCTGCAAAAATTTTTAGCATAGGCCACTAGTGGATC |
| <i>ATG7</i> knockout  | TCATTATATTTCAACAAATATAAGATAATCAAGAATAAAGCTTCGTACGCTGCAGGTCG,<br>ACCACAATATGTACCAATGCATTATATGCAAAAATTTAGCATAGGCCACTAGTGGATC    |
| <i>ATG8</i> knockout  | TAAAGTTGAGAAAATCATAATAAAAATAATTACTAGAGACGCTTCGTACGCTGCAGGTCG,<br>TAGATGTTAACGCTTCATTTCTTTTCATATAAAAAGACTAGCATAGGCCACTAGTGGATC |
| <i>ATG9</i> knockout  | GAACAGCCTGAAATATCAAAATCACGGAATTATTAGGTTGCTTCGTACGCTGCAGGTCG,<br>TAGTTATATTGGATGATGTACACGACACAGTCGCCTTAGCATAGGCCACTAGTGGATC    |
| <i>ATG18</i> knockout | TCCAGTTAACTCTGTATCCTTTTCTTCTTCGGCCTGACAGCTTCGTACGCTGCAGGTCG,<br>GTGACGTACGGAAGGCAGCGCGAGACACTTCCGTGATCAGCATAGGCCACTAGTGGATC   |
| <i>VAC8</i> knockout  | GGGTGTTCTTTCTTCTGTACTATATATACATTTGCAACTGCTTCGTACGCTGCAGGTCG,<br>AAAAATTATAATGCCTAGTCCCGCTTTTGAAGAAAATCAGCATAGGCCACTAGTGGATC   |
| <i>VID24</i> knockout | TCTTGTGCATGACACCAACACATATCGCAAGCTTGAGTCGCTTCGTACGCTGCAGGTCG,<br>AAAAGGGTATGCAGGTAAAAACGAATATATCACACATCAGCATAGGCCACTAGTGGATC   |
| <i>VID28</i> knockout | TGCCCTCGTGTTAGATTGGTGATATATTACAGTTACACTGCTTCGTACGCTGCAGGTCG,<br>AAATTAATTGTAGGAAATACTACGAGTTCTGTGCATTCAGCATAGGCCACTAGTGGATC   |
| <i>VTC1</i> knockout  | TATCGAATACGATTAAACACTACGCCAGATTTCCACAATGCTTCGTACGCTGCAGGTCG,<br>TGCGTAACCCACGCTTACGATATTGGAATTACAATTTAGCATAGGCCACTAGTGGATC    |
| <i>VTC2</i> knockout  | AAGAACGACTACACCTCAACATAACGACACTTTTTTTGACGCTTCGTACGCTGCAGGTCG,<br>TAAAAACACATGGTCTCAGTAGATAGAGTACATATTCTAGCATAGGCCACTAGTGGATC  |
| <i>VTC3</i> knockout  | CGAACAGCAGAATTTGTCCTTGGTTTTTCAGAGTTTGAAAGCTTCGTACGCTGCAGGTCG,<br>GTGTAATATATGTGTATATAAAAAATATACATGTTCTTAGCATAGGCCACTAGTGGATC  |
| <i>VTC4</i> knockout  | AATCGGCAAATAAAAGAGCATAACAAGGCAGGAACAGCTGCTTCGTACGCTGCAGGTCG,<br>TACTTAATTATACAGTAAAAAAAACACGCTGTGTATTTCAGCATAGGCCACTAGTGGATC  |

|                       |                                                                                                                                           |
|-----------------------|-------------------------------------------------------------------------------------------------------------------------------------------|
| <i>EGO1</i> knockout  | TAGCGGTAGTGGATACAACGACAGATTTAAGTCGTAAAAGCTTCGTACGCTGCAGGTCG,<br>AAGCTTGTATACCAATGATGTTATACAAAAAGTTCATTAGCATAGGCCACTAGTGGATC               |
| <i>GTR2</i> knockout  | AACAAAACCTCCAGGACAACGGTACTAATACACATACAACGCTTCGTACGCTGCAGGTCG,<br>ATCTATATACCCTAATATTTTCATGCCTTACGTCTTTCAGCATAGGCCACTAGTGGATC              |
| <i>EGO3</i> knockout  | GTTATCAGCAGCAAACGGTATCCAAAATATTGAAGCAATGCTTCGTACGCTGCAGGTCG,<br>GAAAAGGTGTGGCCTCGATACATATTGTTAAACCCATCAGCATAGGCCACTAGTGGATC               |
| <i>VPS27</i> knockout | CTAAGGTGAATGAGTAGTGAGTAAAGAACTAAGAACAGTGCTTCGTACGCTGCAGGTCG,<br>GTTTCTTTTTTACAAAATACATAGAAAAGGCTACAATATTAGCATAGGCCACTAGTGGATC             |
| <i>VPS23</i> knockout | TCCTAACGGCCAAGAAAAGAGAGAGAGTGAAGAGCAACGGCTTCGTACGCTGCAGGTCG,<br>TTTTTATGGCACTTCGGCGATGCGAAAAGAAAGTGAGTCAGCATAGGCCACTAGTGGATC              |
| <i>SNF7</i> knockout  | CGGAAGCAGCAGAAAACATAACAGTATTGATAAATAAGGCGCTTCGTACGCTGCAGGTCG,<br>TTTTTTTTTCTTTCATCTAAACCGCATAGAACACGTTTCAGCATAGGCCACTAGTGGATC             |
| <i>VPS36</i> knockout | GGAAGTGTGTTTTGAAAGTCATTCTTTTTTTTTTCAAAGGCTTCGTACGCTGCAGGTCG,<br>TTTTTTTTTCTTTCATCTAAACCGCATAGAACACGTTTCAGCATAGGCCACTAGTGGATC              |
| <i>VPS4</i> knockout  | ATAAAGCAGCATAGAGTGCCATATAGTAGATGGGGTACAAGCTTCGTACGCTGCAGGTCG,<br>ACACAAGAAATCTACATTAGCACGTTAATCAATTGACTAGCATAGGCCACTAGTGGATC              |
| <i>FBP1</i> tagging   | GAAATTGACAAATTTTTAGACCATATTGGCAAGTCACAGGCTTCGTACGCTGCAGGTCG,<br>GAACAAAGAAAATAAGAAAAGAAAGGCGATCATTGAACTAGCATAGGCCACTAGTGGATC              |
| <i>VPS23</i> tagging  | GTGCGATGGCACATCCAACGAATCACCTCACCGTTATCGGCTTCGTACGCTGCAGGTCG,<br>TTTTTATGGCACTTCGGCGATGCGAAAAGAAAGTGAGTCAGCATAGGCCACTAGTGGATC              |
| <i>PEP4</i> knockout  | CCTAGTATTTAATCCAAAATAAAATTCAAACAAAAACCAAACTAACGCTTCGTACGCTGCAGGTCG,<br>GATGGCAGAAAAGGATAGGGCGGAGAAGTAAGAAAAGTTTAGCTCAGCATAGGCCACTAGTGGATC |
| <i>VPS4</i> tagging   | CAAGAACAGTTCACCTAGAGATTTTGGTCAAGAAGGTAACGCTTCGTACGCTGCAGGTCG,<br>ACACAAGAAATCTACATTAGCACGTTAATCAATTGACTAGCATAGGCCACTAGTGGATC              |
| <i>ATG15</i> knockout | GCATTACAATTAAGGAAACAAGGGAAATATTCTATTGAGCTTCGTACGCTGCAGGTCG,<br>TAAAACAACACTAGGGTCATAATAGATGTATGGGTCTTAGCATAGGCCACTAGTGGATC                |
| <i>NCRI</i> knockout  | CATCTCCAAAAGAACAAGAGCAGAACTTCGCTTCGTACGCTGCAGGTCG,<br>ACAGATTTTCTGGTGTGGCATCAGGCATAGGCCACTAGTGGATC                                        |
| <i>NPC2</i> knockout  | TCCTTCAAAGCTAGCACGCCTTCGCTTCGTACGCTGCAGGTCG,<br>ACACGGATCAATGAGTTGTATGAATCAGGCATAGGCCACTAGTGGATC                                          |

|                        |                                                                                                                                                                                |
|------------------------|--------------------------------------------------------------------------------------------------------------------------------------------------------------------------------|
| <i>VBA4</i> tagging    | AATATTCATTTTCAACAGAATCCATTGTCGTAGTCAAAATTGTTTGTCACTATCTGGTGACGGTGCTGGTTTAATTAACATGTC,<br>GAAAAAGAAAAAAGTATTTGTATTATTTAAAGTATACATTTTCATCTACCGGTATAGGCCACTAGTGGATCTGATATCATCG    |
| <i>NCRI</i> tagging    | ACTTTCATTGTTTGGTGGTGAAAGCTATAGGGACGATTCCATCGAAGCAGAAGATGGTGACGGTGCTGGTTTAATTAACATGTC,<br>TAACGAATTTTACCCTATTTTTTCACTACGTAAAATATAGTATAAATCTGCTATGGATAGGCCACTAGTGGATCTGATATCATCG |
| <i>YPQ1</i> tagging    | CGTCATATTTTCCCAGTTTTTCATTTACAAAAGAAATAAAAAATTTATACTGAATGGTGACGGTGCTGGTTTAATTAACATGTC,<br>AAAAAAAAGTTTGTGAGGTCAAAAATATGTTAAATAAATATTAGATAGAACATGATAGGCCACTAGTGGATCTGATATCATCG   |
| <i>YPL162C</i> tagging | CTCAAATGAAGTGCCTAACAAGGATAACAACATTTCCAGCTATGGTAGCATAATAGGTGACGGTGCTGGTTTAATTAACATGTC,<br>TCAATTAAGCAAGGAAAGGAAATAAACAGTGCATGCTTTCCTTATCCTTGGAATAATAGGCCACTAGTGGATCTGATATCATCG  |
| <i>DPP1</i> tagging    | CACCCATCAGAGGATCCCGGATGAGGAATTACATCCTTTGTCCGATGAAGGTATGGGTGACGGTGCTGGTTTAATTAACATGTC,<br>ACAATAAATACGTATATTTTCGTATGTCATGTGGAGTATATATTCTTTTTTATTTCATAGGCCACTAGTGGATCTGATATCATCG |
| <i>YCF1</i> tagging    | TAACAAATCATTGTTCTATTCACTGTGCATGGAGGCTGGTTTGGTCAATGAAAATGGTGACGGTGCTGGTTTAATTAACATGTC,<br>TTTATCCATCCTACGTACCAGATTGTGCGGGACAGGTTTTTATTAGTTTCACAGTATAGGCCACTAGTGGATCTGATATCATCG  |

**Table S5. Strains used in this study.**

| Name        | Genotype                                                                                                                                                                                              |
|-------------|-------------------------------------------------------------------------------------------------------------------------------------------------------------------------------------------------------|
| BY4741 [74] | <i>MAT<math>\alpha</math> his3<math>\Delta</math>1 leu2<math>\Delta</math> met15<math>\Delta</math> ura3<math>\Delta</math></i>                                                                       |
| DJ01        | BY4741 <i>MAT<math>\alpha</math> his3<math>\Delta</math>1 leu2<math>\Delta</math> met15<math>\Delta</math> ura3<math>\Delta</math> trp1<math>\Delta</math>::natMX</i>                                 |
| DY03        | BY4741 <i>MAT<math>\alpha</math> his3<math>\Delta</math>1 leu2<math>\Delta</math> met15<math>\Delta</math> ura3<math>\Delta</math> pho8<math>\Delta</math>60 pho13<math>\Delta</math>::LEU2</i>       |
| YMJ83       | DJ01 <i>P<sub>URA3</sub>::URA3(K.l.)·TetR'-Ssn6 VPS23-IAA17-4flag::HIS5(S.p.) P<sub>ADHI</sub>::P<sub>ADHI</sub>-TIR1-9myc·MET15<br/>T<sub>TRP1</sub>::TRP1(K.l.)·TetO7-GFP-PHO8</i>                  |
| YMJ89       | DJ01 <i>P<sub>URA3</sub>::URA3(K.l.)·TetR'-Ssn6 P<sub>VACS</sub>-IAA17-4flag-VAM3::HIS5(S.p.) P<sub>ADHI</sub>::P<sub>ADHI</sub>-TIR1-9myc·MET15<br/>T<sub>TRP1</sub>::TRP1(K.l.)·TetO7-GFP-PHO8</i>  |
| YMJ90       | DJ01 <i>P<sub>URA3</sub>::URA3(K.l.)·TetR'-Ssn6 P<sub>VACS</sub>-IAA17-4flag-VPS39::HIS5(S.p.) P<sub>ADHI</sub>::P<sub>ADHI</sub>-TIR1-9myc·MET15<br/>T<sub>TRP1</sub>::TRP1(K.l.)·TetO7-GFP-PHO8</i> |
| YMJ98       | DJ01 <i>PHO8::P<sub>CUPI</sub>-GFP-PHO8·URA3</i>                                                                                                                                                      |
| YMJ221      | DJ01 <i>VPH1-2<math>\times</math>GFP::URA3(K.l.)</i>                                                                                                                                                  |
| YMJ222      | DJ01 <i>YPQ2-2<math>\times</math>GFP::URA3(K.l.)</i>                                                                                                                                                  |
| YMJ801      | DJ01 <i>HIS3 PHO8::P<sub>CUPI</sub>-GFP-PHO8·URA3 MET15</i>                                                                                                                                           |
| YMJ802      | DJ01 <i>vps4<math>\Delta</math>::HIS5(S.p.) PHO8::P<sub>CUPI</sub>-GFP-PHO8·URA3 MET15</i>                                                                                                            |
| YMJ803      | DJ01 <i>vps23<math>\Delta</math>::HIS5(S.p.) PHO8::P<sub>CUPI</sub>-GFP-PHO8·URA3 MET15</i>                                                                                                           |
| YMJ804      | DJ01 <i>atg8<math>\Delta</math>::MET15 PHO8::P<sub>CUPI</sub>-GFP-PHO8·URA3 HIS3</i>                                                                                                                  |
| YMJ806      | DJ01 <i>vps4<math>\Delta</math>::HIS5(S.p.) PHO8::P<sub>CUPI</sub>-GFP-PHO8·URA3 atg8<math>\Delta</math>::MET15</i>                                                                                   |
| YMJ807      | DJ01 <i>vps23<math>\Delta</math>::HIS5(S.p.) PHO8::P<sub>CUPI</sub>-GFP-PHO8·URA3 atg8<math>\Delta</math>::MET15</i>                                                                                  |
| YMJ224      | DJ01 <i>3HA-ATG8<math>\Delta</math>GR::MET15 PHO8::P<sub>CUPI</sub>-GFP-PHO8·URA3 HIS3</i>                                                                                                            |
| YMJ225      | DJ01 <i>3HA-ATG8<math>\Delta</math>R::MET15 PHO8::P<sub>CUPI</sub>-GFP-PHO8·URA3 atg4<math>\Delta</math>::HIS5(S.p.)</i>                                                                              |
| YMJ226      | DJ01 <i>3HA-ATG8::MET15 PHO8::P<sub>CUPI</sub>-GFP-PHO8·URA3 HIS3</i>                                                                                                                                 |
| YMJ729      | DJ01 <i>OSHI::P<sub>CUPI</sub>-GFP-OSHI·URA3</i>                                                                                                                                                      |
| YMJ731      | DJ01 <i>vac8<math>\Delta</math>::HIS5(S.p.) OSH1::P<sub>CUPI</sub>-GFP-OSHI·URA3</i>                                                                                                                  |
| YMJ155      | DJ01 <i>FBP1-4V5::URA3(K.l.)</i>                                                                                                                                                                      |
| YMJ156      | DJ01 <i>vid28<math>\Delta</math>::HIS5(S.p.) FBP1-4V5::URA3(K.l.)</i>                                                                                                                                 |
| YMJ157      | DJ01 <i>vid24<math>\Delta</math>::HIS5(S.p.) FBP1-4V5::URA3(K.l.)</i>                                                                                                                                 |
| YMJ111      | DY03 <i>atg1<math>\Delta</math>::HIS5(S.p.) pho8<math>\Delta</math>60::P<sub>CUPI</sub>-GFP-PHO8::URA3</i>                                                                                            |

|        |                                                                         |
|--------|-------------------------------------------------------------------------|
| YMJ112 | DY03 <i>atg2Δ::HIS5(S.p.) pho8Δ60::P<sub>CUP1</sub>-GFP-PHO8::URA3</i>  |
| YMJ114 | DY03 <i>atg7Δ::HIS5(S.p.) pho8Δ60::P<sub>CUP1</sub>-GFP-PHO8::URA3</i>  |
| YMJ115 | DY03 <i>atg8Δ::HIS5(S.p.) pho8Δ60::P<sub>CUP1</sub>-GFP-PHO8::URA3</i>  |
| YMJ116 | DY03 <i>atg9Δ::HIS5(S.p.) pho8Δ60::P<sub>CUP1</sub>-GFP-PHO8::URA3</i>  |
| YMJ117 | DY03 <i>atg18Δ::HIS5(S.p.) pho8Δ60::P<sub>CUP1</sub>-GFP-PHO8::URA3</i> |
| YMJ118 | DJ01 <i>PHO8::P<sub>CUP1</sub>-GFP-PHO8-URA3 HIS3</i>                   |
| YMJ119 | DY03 <i>P<sub>CUP1</sub>-GFP-PHO8::URA3 HIS3</i>                        |
| YMJ100 | DJ01 <i>pep4Δ::HIS5(S.p.) PHO8::P<sub>CUP1</sub>-GFP-PHO8-URA3</i>      |
| YMJ101 | DJ01 <i>vps4Δ::HIS5(S.p.) PHO8::P<sub>CUP1</sub>-GFP-PHO8-URA3</i>      |
| YMJ102 | DJ01 <i>vps23Δ::HIS5(S.p.) PHO8::P<sub>CUP1</sub>-GFP-PHO8-URA3</i>     |
| YMJ103 | DJ01 <i>vps27Δ::HIS5(S.p.) PHO8::P<sub>CUP1</sub>-GFP-PHO8-URA3</i>     |
| YMJ104 | DJ01 <i>vps36Δ::HIS5(S.p.) PHO8::P<sub>CUP1</sub>-GFP-PHO8-URA3</i>     |
| YMJ105 | DJ01 <i>snf7Δ::HIS5(S.p.) PHO8::P<sub>CUP1</sub>-GFP-PHO8-URA3</i>      |
| YMJ107 | DJ01 <i>vid24Δ::HIS5(S.p.) PHO8::P<sub>CUP1</sub>-GFP-PHO8-URA3</i>     |
| YMJ216 | DJ01 <i>vac8Δ::HIS5(S.p.) PHO8::P<sub>CUP1</sub>-GFP-PHO8-URA3</i>      |
| YMJ218 | DJ01 <i>vid28Δ::HIS5(S.p.) PHO8::P<sub>CUP1</sub>-GFP-PHO8-URA3</i>     |
| YMJ410 | DY03 <i>HIS3</i>                                                        |
| YMJ411 | DY03 <i>atg1Δ::HIS5(S.p.)</i>                                           |
| YMJ412 | DY03 <i>atg2Δ::HIS5(S.p.)</i>                                           |
| YMJ414 | DY03 <i>atg7Δ::HIS5(S.p.)</i>                                           |
| YMJ415 | DY03 <i>atg8Δ::HIS5(S.p.)</i>                                           |
| YMJ416 | DY03 <i>atg9Δ::HIS5(S.p.)</i>                                           |
| YMJ417 | DY03 <i>atg18Δ::HIS5(S.p.)</i>                                          |
| YMJ421 | DJ01 <i>CPS1::P<sub>CUP1</sub>-GFP-CPS1-URA3</i>                        |
| YMJ431 | DJ01 <i>vps4Δ::HIS5(S.p.) CPS1::P<sub>CUP1</sub>-GFP-CPS1-URA3</i>      |
| YMJ432 | DJ01 <i>vps23Δ::HIS5(S.p.) CPS1::P<sub>CUP1</sub>-GFP-CPS1-URA3</i>     |
| YMJ433 | DJ01 <i>vps27Δ::HIS5(S.p.) CPS1::P<sub>CUP1</sub>-GFP-CPS1-URA3</i>     |
| YMJ434 | DJ01 <i>vps36Δ::HIS5(S.p.) CPS1::P<sub>CUP1</sub>-GFP-CPS1-URA3</i>     |
| YMJ435 | DJ01 <i>snf7Δ::HIS5(S.p.) CPS1::P<sub>CUP1</sub>-GFP-CPS1-URA3</i>      |

|        |                                                                                                                                                  |
|--------|--------------------------------------------------------------------------------------------------------------------------------------------------|
| YMJ702 | DJ01 <i>TRP1(K.l.) URA3(K.l.)</i>                                                                                                                |
| YMJ704 | DJ01 <i>pho8Δ::TRP1(K.l.) URA3(K.l.)</i>                                                                                                         |
| YMJ705 | DJ01 <i>pho8Δ::P<sub>CUP1</sub>-GFP-PHO8-URA3-TRP1(K.l.)</i>                                                                                     |
| YMJ720 | DJ01 <i>vtc1Δ:HIS5(S.p.) PHO8::P<sub>CUP1</sub>-GFP-PHO8-URA3</i>                                                                                |
| YMJ721 | DJ01 <i>vtc2Δ:HIS5(S.p.) PHO8::P<sub>CUP1</sub>-GFP-PHO8-URA3</i>                                                                                |
| YMJ722 | DJ01 <i>vtc3Δ:HIS5(S.p.) PHO8::P<sub>CUP1</sub>-GFP-PHO8-URA3</i>                                                                                |
| YMJ723 | DJ01 <i>vtc4Δ:HIS5(S.p.) PHO8::P<sub>CUP1</sub>-GFP-PHO8-URA3</i>                                                                                |
| YMJ724 | DJ01 <i>ego1Δ:HIS5(S.p.) PHO8::P<sub>CUP1</sub>-GFP-PHO8-URA3</i>                                                                                |
| YMJ725 | DJ01 <i>gtr2Δ:HIS5(S.p.) PHO8::P<sub>CUP1</sub>-GFP-PHO8-URA3</i>                                                                                |
| YMJ726 | DJ01 <i>ego3Δ:HIS5(S.p.) PHO8::P<sub>CUP1</sub>-GFP-PHO8-URA3</i>                                                                                |
| YMJ728 | DJ01 <i>atg15Δ:HIS5(S.p.) PHO8::P<sub>CUP1</sub>-GFP-PHO8-URA3</i>                                                                               |
| YMJ735 | DJ01 <i>P<sub>ADH1</sub>::P<sub>ADH1</sub>-TIR1-9myc-MET VPS23-IAA17-4flag::HIS5(S.p.) T<sub>TRP1</sub>::TRP1(K.l.)-P<sub>GAL</sub>-GFP-CPS1</i> |
| YMJ764 | DJ01 <i>HIS3 CPS1::P<sub>CUP1</sub>-GFP-CPS1-URA3</i>                                                                                            |
| YMJ766 | DJ01 <i>VPS23-IAA17-4flag::HIS5(S.p.) CPS1::P<sub>CUP1</sub>-GFP-CPS1-URA3</i>                                                                   |
| YMJ770 | DJ01 <i>MET15 CPS1::P<sub>CUP1</sub>-GFP-CPS1-URA3</i>                                                                                           |
| YMJ771 | DJ01 <i>atg8Δ::MET15 CPS1::P<sub>CUP1</sub>-GFP-CPS1-URA3</i>                                                                                    |
| YCF030 | DJ01 <i>pho8Δ::TRP1(K.l.) Ter<sub>PHO8</sub>::P<sub>CUP1</sub>-GFP-PHO8(K(24,25,30,33)R)-URA(K.l.)</i>                                           |
| YCF031 | DJ01 <i>pho8Δ::TRP1(K.l.) Ter<sub>PHO8</sub>::P<sub>CUP1</sub>-GFP-PHO8(K33R)-URA(K.l.)</i>                                                      |
| YCF032 | DJ01 <i>pho8Δ::TRP1(K.l.) Ter<sub>PHO8</sub>::P<sub>CUP1</sub>-GFP-PHO8(K(30,33)R)-URA(K.l.)</i>                                                 |
| YCF036 | DJ01 <i>pho8Δ::TRP1(K.l.) Ter<sub>PHO8</sub>::P<sub>CUP1</sub>-GFP-PHO8(K(24,25,30)R)-URA(K.l.)</i>                                              |
| YCF037 | DJ01 <i>LEU(K.l.) MET15 PHO8::P<sub>CUP1</sub>-GFP-PHO8-URA3(K.l.)</i>                                                                           |
| YCF038 | DJ01 <i>LEU(K.l.) MET15 TLG3::TGL3-GFP</i>                                                                                                       |
| YCF114 | DJ01 <i>ncr1Δ::LEU(K.l.) npc2Δ::MET15</i>                                                                                                        |
| YCF117 | YCF114 <i>PHO8::P<sub>CUP1</sub>-GFP-PHO8-URA3(K.l.)</i>                                                                                         |
| YCF120 | YCF114 <i>TLG3::TGL3-GFP</i>                                                                                                                     |
| YCF130 | YMJ115 <i>P<sub>ATG8</sub>::P<sub>ATG8</sub>-3VSV-ATG8-MET15</i>                                                                                 |
| YCF134 | YMJ115 <i>P<sub>ATG8</sub>::P<sub>ATG8</sub>-3VSV-ATG8(T56A T87A)-MET15</i>                                                                      |
| YCF135 | YMJ115 <i>P<sub>ATG8</sub>::P<sub>ATG8</sub>-3VSV-ATG8(P85A P86A)-MET15</i>                                                                      |

|        |                                                                                                                        |
|--------|------------------------------------------------------------------------------------------------------------------------|
| YCF136 | YMJ115 $P_{ATG8}::P_{ATG8}$ -3VSV-ATG8(P85L P86L)-MET15                                                                |
| YCF137 | YMJ115 $P_{ATG8}::P_{ATG8}$ -3VSV-ATG8(R65A P85A P86A)-MET15                                                           |
| YCF138 | YMJ115 $P_{ATG8}::P_{ATG8}$ -3VSV-ATG8(R65A P85L P86L)-MET15                                                           |
| YCF142 | YMJ115 $P_{ATG8}::P_{ATG8}$ -3VSV-ATG8(T56A R65A T87A)-MET15                                                           |
| YCF151 | YMJ115 $P_{ATG8}::P_{ATG8}$ -3VSV-ATG8(L55W T56A V61W R65A)-MET15                                                      |
| YMJ745 | DJ01 <i>hfl1Δ::HIS5(S.p.) P<sub>CUP1</sub>-GFP-PHO8::URA3</i>                                                          |
| YCH437 | BY4741 <i>trp1Δ::natMX6 atg4Δ::HIS5 hfl1Δ::TRP1(k.l.) 3HA-ATG8ΔR::MET15 PHO8::P<sub>CUP1</sub>-GFP-PHO8-URA3(K.l.)</i> |
| YCH601 | BY4741 <i>hfl1Δ::HIS3 PHO8::P<sub>CUP1</sub>-GFP-PHO8-URA3(K.l.) LEU2::P<sub>HFL1</sub>-HFL1-8flag</i>                 |
| YCH602 | BY4741 <i>hfl1Δ::HIS3 PHO8::P<sub>CUP1</sub>-GFP-PHO8-URA3(K.l.) LEU2::P<sub>HFL1</sub>-HFL1(W371A)-8flag</i>          |
| YCH603 | BY4741 <i>hfl1Δ::HIS3 PHO8::P<sub>CUP1</sub>-GFP-PHO8-URA3(K.l.) LEU2::P<sub>HFL1</sub>-HFL1(I375A)-8flag</i>          |
| YCH604 | BY4741 <i>hfl1Δ::HIS3 PHO8::P<sub>CUP1</sub>-GFP-PHO8-URA3(K.l.) LEU2::P<sub>HFL1</sub>-HFL1(D384A)-8flag</i>          |
| YCH605 | BY4741 <i>hfl1Δ::HIS3 PHO8::P<sub>CUP1</sub>-GFP-PHO8-URA3(K.l.) LEU2::P<sub>HFL1</sub>-HFL1(Y387A)-8flag</i>          |
| YCH606 | BY4741 <i>hfl1Δ::HIS3 PHO8::P<sub>CUP1</sub>-GFP-PHO8-URA3(K.l.) LEU2::P<sub>HFL1</sub>-HFL1(W371AI375A)-8flag</i>     |
| YCH607 | BY4741 <i>hfl1Δ::HIS3 PHO8::P<sub>CUP1</sub>-GFP-PHO8-URA3(K.l.) LEU2::P<sub>HFL1</sub>-HFL1(D384AY387A)-8flag</i>     |
| YCH608 | BY4741 <i>hfl1Δ::HIS3 PHO8::P<sub>CUP1</sub>-GFP-PHO8-URA3(K.l.) LEU2::P<sub>HFL1</sub>-HFL1(WIDY)-8flag</i>           |
| YCH630 | BY4741 <i>atg8Δ::HIS3 P<sub>ATG8</sub>::P<sub>ATG8</sub>-8V5-ATG8-MET17</i>                                            |
| YCH631 | YCH630 <i>LEU2::P<sub>TEF1</sub>-HFL1-GFP</i>                                                                          |
| YCH632 | YCH630 <i>LEU2::P<sub>TEF1</sub>-HFL1(W371A)-GFP</i>                                                                   |
| YCH633 | YCH630 <i>LEU2::P<sub>TEF1</sub>-HFL1(I375A)-GFP</i>                                                                   |
| YCH634 | YCH630 <i>LEU2::P<sub>TEF1</sub>-HFL1(D384A)-GFP</i>                                                                   |
| YCH635 | YCH630 <i>LEU2::P<sub>TEF1</sub>-HFL1(Y387A)-GFP</i>                                                                   |
| YCH636 | YCH630 <i>LEU2::P<sub>TEF1</sub>-HFL1(W371AI375A)-GFP</i>                                                              |
| YCH637 | YCH630 <i>LEU2::P<sub>TEF1</sub>-HFL1(D384AY387A)-GFP</i>                                                              |
| YCH638 | YCH630 <i>LEU2::P<sub>TEF1</sub>-HFL1(WIDY)-GFP</i>                                                                    |
| YCH641 | BY4741 <i>LEU2::P<sub>TEF1</sub>-HFL1-GFP::LEU2 P<sub>ATG8</sub>:: P<sub>ATG8</sub>-3VSV-ATG8-MET17</i>                |
| YCH642 | BY4741 <i>atg8Δ::HIS3 LEU2::P<sub>TEF1</sub>-HFL1-GFP P<sub>ATG8</sub>::P<sub>ATG8</sub>-3VSV-ATG8-MET17</i>           |
| YCH643 | BY4741 <i>atg8Δ::HIS3 LEU2::P<sub>TEF1</sub>-HFL1-GFP P<sub>ATG8</sub>::P<sub>ATG8</sub>-3VSV-ATG8(T56AT87A)-MET17</i> |

|        |                                                                                                                                |
|--------|--------------------------------------------------------------------------------------------------------------------------------|
| YCH644 | BY4741 <i>atg8Δ::HIS3 LEU2::P<sub>TEF1</sub>-HFL1-GFP P<sub>ATG8</sub>::P<sub>ATG8</sub>-3VSV-ATG8(P85AP86A)·MET17</i>         |
| YCH645 | BY4741 <i>atg8Δ::HIS3 LEU2::P<sub>TEF1</sub>-HFL1-GFP P<sub>ATG8</sub>::P<sub>ATG8</sub>-3VSV-ATG8(P85LP86L)·MET17</i>         |
| YCH646 | BY4741 <i>atg8Δ::HIS3 LEU2::P<sub>TEF1</sub>-HFL1-GFP P<sub>ATG8</sub>::P<sub>ATG8</sub>-3VSV-ATG8(R65AT56AT87A)·MET17</i>     |
| YCH647 | BY4741 <i>atg8Δ::HIS3 LEU2::P<sub>TEF1</sub>-HFL1-GFP P<sub>ATG8</sub>::P<sub>ATG8</sub>-3VSV-ATG8(R65AP85AP86A)·MET17</i>     |
| YCH648 | BY4741 <i>atg8Δ::HIS3 LEU2::P<sub>TEF1</sub>-HFL1-GFP P<sub>ATG8</sub>::P<sub>ATG8</sub>-3VSV-ATG8(R65AP85LP86L)·MET17</i>     |
| YCH649 | BY4741 <i>atg8Δ::HIS3 LEU2::P<sub>TEF1</sub>-HFL1-GFP P<sub>ATG8</sub>::P<sub>ATG8</sub>-3VSV-ATG8(L55WT56AV61WR65A)·MET17</i> |
| YMJ211 | DJ01 <i>EGO3-GFP·URA3(K.l.)</i>                                                                                                |
| YMJ301 | DJ01 <i>vps4Δ::HIS5(S.p.) VPH1-2×GFP·URA3(K.l.)</i>                                                                            |
| YMJ302 | DJ01 <i>vps23Δ::HIS5(S.p.) VPH1-2×GFP·URA3(K.l.)</i>                                                                           |
| YMJ303 | DJ01 <i>vps27Δ::HIS5(S.p.) VPH1-2×GFP·URA3(K.l.)</i>                                                                           |
| YMJ304 | DJ01 <i>vps36Δ::HIS5(S.p.) VPH1-2×GFP·URA3(K.l.)</i>                                                                           |
| YMJ305 | DJ01 <i>snf7Δ::HIS5(S.p.) VPH1-2×GFP·URA3(K.l.)</i>                                                                            |
| YMJ309 | DJ01 <i>VPH1-2×GFP·URA3(K.l.)</i>                                                                                              |
| YMJ310 | DY03 <i>VPH1-2×GFP·URA3(K.l.)</i>                                                                                              |
| YMJ311 | DY03 <i>atg1Δ::HIS5(S.p.) VPH1-2×GFP·URA3(K.l.)</i>                                                                            |
| YMJ312 | DY03 <i>atg2Δ::HIS5(S.p.) VPH1-2×GFP·URA3(K.l.)</i>                                                                            |
| YMJ314 | DY03 <i>atg7Δ::HIS5(S.p.) VPH1-2×GFP·URA3(K.l.)</i>                                                                            |
| YMJ315 | DY03 <i>atg8Δ::HIS5(S.p.) VPH1-2×GFP·URA3(K.l.)</i>                                                                            |
| YMJ316 | DY03 <i>atg9Δ::HIS5(S.p.) VPH1-2×GFP·URA3(K.l.)</i>                                                                            |
| YMJ317 | DY03 <i>atg18Δ::HIS5(S.p.) VPH1-2×GFP·URA3(K.l.)</i>                                                                           |
| YCF155 | TN124 <i>metΔ hisΔ uraΔ atg8Δ::NAT</i>                                                                                         |
| YCF156 | YCF155 <i>P<sub>ATG8</sub>::P<sub>ATG8</sub>-3VSV-ATG8·MET</i>                                                                 |
| YCF157 | YCF155 <i>P<sub>ATG8</sub>::P<sub>ATG8</sub>-3VSV-ATG8(T56A T87A)·MET</i>                                                      |
| YCF158 | YCF155 <i>P<sub>ATG8</sub>::P<sub>ATG8</sub>-3VSV-ATG8(P85A P86A)·MET</i>                                                      |
| YCF159 | YCF155 <i>P<sub>ATG8</sub>::P<sub>ATG8</sub>-3VSV-ATG8(P85L P86L)·MET</i>                                                      |
| YCF165 | YCF155 <i>P<sub>ATG8</sub>::P<sub>ATG8</sub>-3VSV-ATG8(T56A R65A T87A)·MET</i>                                                 |
| YCF190 | DJ01 <i>P<sub>CUP1</sub>-4myc-PHO8·TRP(K.l.)</i>                                                                               |



|        |                                                                                              |
|--------|----------------------------------------------------------------------------------------------|
| YCF193 | DJ01 <i>P<sub>CUP1</sub>-4V5-PHO8·MET</i>                                                    |
| YCF732 | DJ01 <i>ATG18-2GFP·URA3(K.l.)</i>                                                            |
| YCF908 | DJ01 <i>Ter<sub>ADHI</sub>::P<sub>CUP1</sub>-VAC8-GFP·URA3(K.l.)</i>                         |
| YCF909 | DJ01 <i>Ter<sub>ADHI</sub>::P<sub>CUP1</sub>-GFP-VMA13·URA3(K.l.)</i>                        |
| YCF910 | DJ01 <i>Ter<sub>ADHI</sub>::P<sub>CUP1</sub>-mRuby3-PHO8·URA3(K.l.)</i>                      |
| YCF919 | DJ01 <i>VBA4-2GFP·URA3(K.l.)</i>                                                             |
| YCF920 | DJ01 <i>NCRI-2GFP·URA3(K.l.)</i>                                                             |
| YCF921 | DJ01 <i>YPQ1-2GFP·URA3(K.l.)</i>                                                             |
| YCF922 | DJ01 <i>YPL162C-2GFP·URA3(K.l.)</i>                                                          |
| YCF923 | DJ01 <i>DPP1-2GFP·URA3(K.l.)</i>                                                             |
| YCF924 | DJ01 <i>YCF1-2GFP·URA3(K.l.)</i>                                                             |
| YCH660 | DJ01 <i>LEU2::PTEF1-HFL1(WIDY)-GFP</i>                                                       |
| YCH661 | DJ01 <i>vps23Δ::HIS5(S.p.) LEU2::PTEF1-HFL1-GFP</i>                                          |
| YCH662 | DJ01 <i>atg8Δ::HIS5(S.p.) LEU2::PTEF1-HFL1-GFP</i>                                           |
| YCH663 | DJ01 <i>hfl1Δ::HIS5(S.p.) atg8Δ::natMX PHO8::P<sub>CUP1</sub>-GFP-PHO8·URA3</i>              |
| YCH664 | DY03 <i>atg4Δ::HIS5(S.p.) ATG8::GFP-ATG8ΔR·URA3 HFL1::P<sub>HFL1</sub>-HFL1-4flag·natMX6</i> |
| YCH665 | DY03 <i>ATG8::GFP-ATG8·URA3 HFL1::P<sub>HFL1</sub>-HFL1-4flag·natMX6</i>                     |
| YCH666 | DY03 <i>atg4Δ::HIS5(S.p.) ATG8::GFP-ATG8ΔR·URA3 HFL1::P<sub>TEF1</sub>-HFL1-4flag·natMX6</i> |
| YCH667 | DY03 <i>ATG8::GFP-ATG8·URA3 HFL1::P<sub>TEF1</sub>-HFL1-4flag·natMX6</i>                     |
| YMJ320 | DJ01 <i>hfl1Δ::HIS5(S.p.) VPH1-2×GFP::URA3(K.l.)</i>                                         |
